# Supplementary material
Source: ML conference proceedings conference paper supplement (https://openreview.net/forum?id=q-FRENiEP_d)
Supplement: supplementary_material [file attachment]

# 1 Appendix

## 2 A Implementation details

3 We conduct experiments using Python and PyTorch<sup>1</sup> [1] with a single NVIDIA TITAN RTX for point  
4 clouds and NVIDIA RTX 3090 for 2D image classification. Following the original configuration  
5 in [2, 3, 4], we use the Adam [5] optimizer with an initial learning rate of  $10^{-3}$  for PointNet<sup>2</sup> [2]  
6 and PointNet++<sup>2</sup> [3] and SGD with an initial learning rate of  $10^{-1}$  for DGCNN<sup>3</sup> [4]. We train  
7 models with a batch size of 32 for 500 epochs. For a fair comparison with previous works [6, 7],  
8 we also adopt conventional data augmentations with our framework (*i.e.*, scaling and shifting for  
9 MN40 [8] and rotation and jittering for ScanObjectNN<sup>4</sup>[9]). When the performance of a baseline on  
10 ScanObjectNN is unavailable in the original paper of PointMixup [6] and RSMix<sup>5</sup> [7], we reproduce  
11 the results based on their official code. For hyperparameters of SageMix, we opt  $\theta = 0.2$  in entire  
12 experiments. Regarding the bandwidth for RBF kernel, we opt  $\sigma = 2.0$  for PointNet and  $\sigma = 0.3$  for  
13 PointNet++ and DGCNN.

## 14 B Additional Experiments

### 15 B.1 Error bars

16 Performance oscillation is an important issue in point cloud benchmarks. However, for a fair  
17 comparison with the numbers reported in PointMixup [6] and RSMix [7], we followed the prevalent  
18 evaluation metric in point clouds, which reports the best validation accuracy. Apart from this, we  
19 here provide the additional results with five runs on OBJ\_ONLY. The mean and standard deviation  
20 are presented in Table 1.

Table 1: Mean and standard deviation measures on OBJ\_ONLY.

| Method           | Model             |                   |                   |
|------------------|-------------------|-------------------|-------------------|
|                  | PointNet [2]      | PointNet++ [3]    | DGCNN [4]         |
| Base             | 78.56±0.51        | 86.14±0.39        | 85.72±0.44        |
| + PointMixup [6] | 78.88±0.28        | 87.50±0.26        | 86.26±0.34        |
| + RSMix [7]      | 77.60±0.56        | 87.30±0.65        | 85.88±0.59        |
| <b>+ SageMix</b> | <b>79.14±0.30</b> | <b>88.42±0.26</b> | <b>87.32±0.53</b> |

### 21 B.2 Manifold mixup

22 We train DGCNN [4] to validate the SageMix in a feature space. Following manifold Mixup [10], we  
23 apply SageMix in a randomly selected layer. The results are summarized in Table 2. We observe the  
24 competitiveness of SageMix in feature space with the performance improvements by 0.6%, 1.5%,  
25 3.3% in MN40, OBJ\_ONLY, and PB\_T50\_RS, respectively.

### 26 B.3 Uncertainty calibration

27 In this section, we measure the Expected Calibration Error (ECE) [11] of the model on three datasets.  
28 As shown in Table 3, our model consistently has the lowest calibration error on every dataset.  
29 Specifically, SageMix lowers ECE by 16.1%, 14.7%, and 15.6% compared to vanilla DGCNN in  
30 MN40, OBJ\_ONLY, and PB\_T50\_RS, respectively.

<sup>1</sup>©2016 Facebook, Inc (Adam Paszke). Licensed under BSD-3-Clause License

<sup>2</sup>©2017 Charles R. Qi. Licensed under MIT License

<sup>3</sup>©2019 Yue Wang. Licensed under MIT License

<sup>4</sup>©2019 Vision & Graphics Group, HKUST. Licensed under MIT License

<sup>5</sup>©2020 dogyoonlee. Licensed under MIT License

Table 2: SageMix in input and feature space.

| Method                    | MN40 | OBJ_ONLY | PB_T50_RS |
|---------------------------|------|----------|-----------|
| DGCNN [4]                 | 92.9 | 86.2     | 79.9      |
| + SageMix (Input Space)   | 93.6 | 88.0     | 83.6      |
| + SageMix (Feature Space) | 93.5 | 87.7     | 83.2      |

Table 3: Expected calibration error with DGCNN.

| Dataset   | Vanilla | PointMixup [6] | RSMix [7] | SageMix    |
|-----------|---------|----------------|-----------|------------|
| MN40      | 18.3    | 2.4            | 24.2      | <b>2.2</b> |
| OBJ_ONLY  | 19.8    | 6.8            | 18.9      | <b>5.1</b> |
| PB_T50_RS | 18.9    | 4.2            | 16.7      | <b>3.3</b> |

#### 31 B.4 Detailed results of 2D classification

32 We largely follow the setting in Co-Mixup<sup>6</sup> [12] except for the learning rate. We trained 300 epochs  
 33 with the batch size of 128. We adopt SGD as an optimizer with an initial learning rate of 0.1. We set  
 34 the weight decay and the momentum as  $10^{-4}$  and 0.9, respectively. We consider the column number  
 35 and the row number as the coordinates of each pixel. For SageMix, we use  $\theta = 0.3$  and  $\sigma = 8$ .  
 36 In Table 4, we report the accuracy and latency for each method. The second row of the table shows  
 37 the running time per epoch. Our method is  $\times 6.05$  faster than Co-Mixup [12]. It is worth noting that  
 38 our framework achieves state-of-the-art performance with a tolerable computational cost considering  
 39 the improvements.

Table 4: 2D classification with PreActResNet18 [13] on CIFAR-100.

|            | Vanilla | Mixup | Manifold | CutMix | SaliencyMix | Puzzle Mix | Co-Mixup | Ours         |
|------------|---------|-------|----------|--------|-------------|------------|----------|--------------|
| ACC. (%)   | 76.41   | 77.57 | 78.36    | 78.71  | 79.06       | 79.38      | 80.13    | <b>80.16</b> |
| Time.(sec) | 13.1    | 20.4  | 20.8     | 23.4   | 21.1        | 34.9       | 147.0    | 24.3         |

## 40 C Qualitative results

### 41 C.1 Visualization

42 In this section, we provide the qualitative results of SageMix. As in Figure 1 and Figure 2, given  
 43 original samples (left and right), SageMix generate the augmented samples (middle). Also, we  
 44 qualitatively compare SageMix with other baselines in Figure 3.

## 45 D Negative societal impacts and limitations

### 46 D.1 Negative Societal Impacts

47 SageMix is designed for alleviating the problems of overfitting and data scarcity. To the best of  
 48 our understanding, SageMix has no direct negative societal impact. However, similar to previous  
 49 augmentation methods, our framework can be misused for malicious application. Especially, point  
 50 clouds are widely used in various domains such as autonomous self-driving cars. In the real world,  
 51 we cannot guarantee that virtual samples generated by data augmentation are always helpful for  
 52 models to recognize objects. To mitigate this potential problem, we need additional verification for  
 53 data augmentation methods.

<sup>6</sup>©2021 Jang-Hyun Kim, Wonho Choo, Hosan Jeong, and Hyun Oh Song. Licensed under MIT License

## 54 D.2 Limitations

55 Since SageMix calculates point-wise weights using the RBF kernel, an additional hyperparameter  
56  $\sigma$  is required. Despite the consistent improvements, we empirically observed that the performance  
57 slightly varies according to the bandwidth. Although we demonstrated that our framework improves  
58 dense representation, as shown in part segmentation experiments, other localization tasks such as  
59 object detection have not been studied with our method. We believe that our method can be extended  
60 to diverse tasks including scene segmentation and object detection on indoor and outdoor scene point  
61 cloud datasets. These are left for future work.

## 62 References

- 63 [1] Adam Paszke, Sam Gross, Francisco Massa, Adam Lerer, James Bradbury, Gregory Chanan,  
64 Trevor Killeen, Zeming Lin, Natalia Gimelshein, Luca Antiga, et al. Pytorch: An imperative  
65 style, high-performance deep learning library. *NeurIPS*, 2019.
- 66 [2] Charles R Qi, Hao Su, Kaichun Mo, and Leonidas J Guibas. Pointnet: Deep learning on point  
67 sets for 3d classification and segmentation. In *CVPR*, 2017.
- 68 [3] Charles Ruizhongtai Qi, Li Yi, Hao Su, and Leonidas J Guibas. Pointnet++: Deep hierarchical  
69 feature learning on point sets in a metric space. *NeurIPS*, 2017.
- 70 [4] Yue Wang, Yongbin Sun, Ziwei Liu, Sanjay E Sarma, Michael M Bronstein, and Justin M  
71 Solomon. Dynamic graph cnn for learning on point clouds. *TOG*, 2019.
- 72 [5] Diederik P. Kingma and Jimmy Ba. Adam: A method for stochastic optimization. In *ICLR*,  
73 2015.
- 74 [6] Yunlu Chen, Vincent Tao Hu, Efstratios Gavves, Thomas Mensink, Pascal Mettes, Pengwan  
75 Yang, and Cees GM Snoek. Pointmixup: Augmentation for point clouds. In *ECCV*, 2020.
- 76 [7] Dogyoon Lee, Jaeha Lee, Junhyeop Lee, Hyeongmin Lee, Minhyeok Lee, Sungmin Woo, and  
77 Sangyoun Lee. Regularization strategy for point cloud via rigidly mixed sample. In *CVPR*,  
78 2021.
- 79 [8] SketchUp. 3D Warehouse, 2022. URL <https://3dwarehouse.sketchup.com/>.
- 80 [9] Mikaela Angelina Uy, Quang-Hieu Pham, Binh-Son Hua, Thanh Nguyen, and Sai-Kit Yeung.  
81 Revisiting point cloud classification: A new benchmark dataset and classification model on  
82 real-world data. In *ICCV*, 2019.
- 83 [10] Vikas Verma, Alex Lamb, Christopher Beckham, Amir Najafi, Ioannis Mitliagkas, David Lopez-  
84 Paz, and Yoshua Bengio. Manifold mixup: Better representations by interpolating hidden states.  
85 In *ICML*, 2019.
- 86 [11] Chuan Guo, Geoff Pleiss, Yu Sun, and Kilian Q Weinberger. On calibration of modern neural  
87 networks. In *ICML*, 2017.
- 88 [12] Jang-Hyun Kim, Wonho Choo, Hosan Jeong, and Hyun Oh Song. Co-mixup: Saliency guided  
89 joint mixup with supermodular diversity. In *ICLR*, 2021.
- 90 [13] Kaiming He, Xiangyu Zhang, Shaoqing Ren, and Jian Sun. Identity mappings in deep residual  
91 networks. In *ECCV*, 2016.

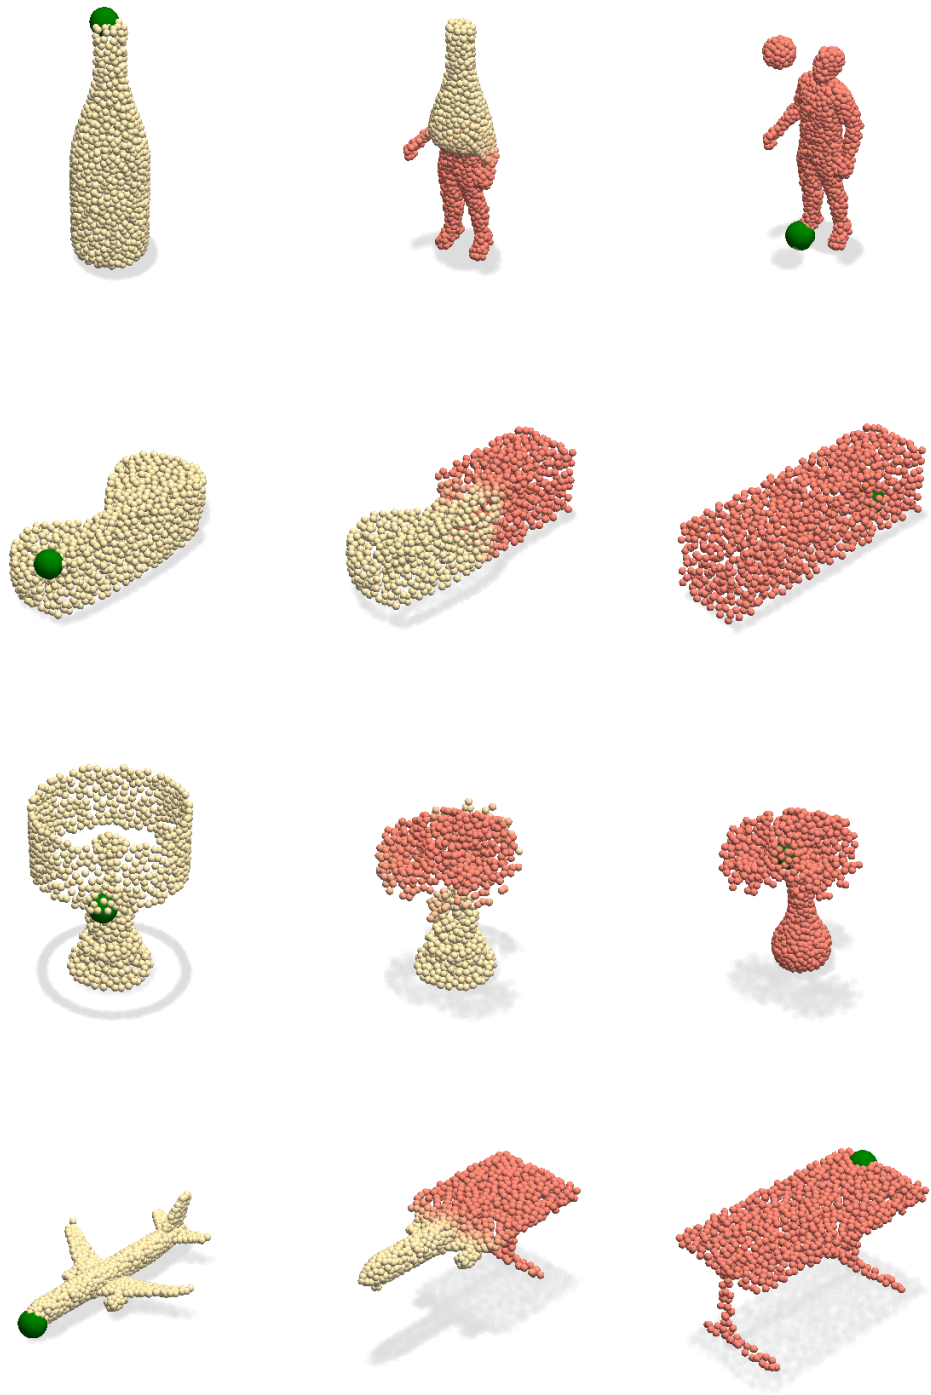

Figure 1: **Visualization of augmented samples by SageMix.** Given two samples (left and right), SageMix generates a sample (middle) based on **query points**.

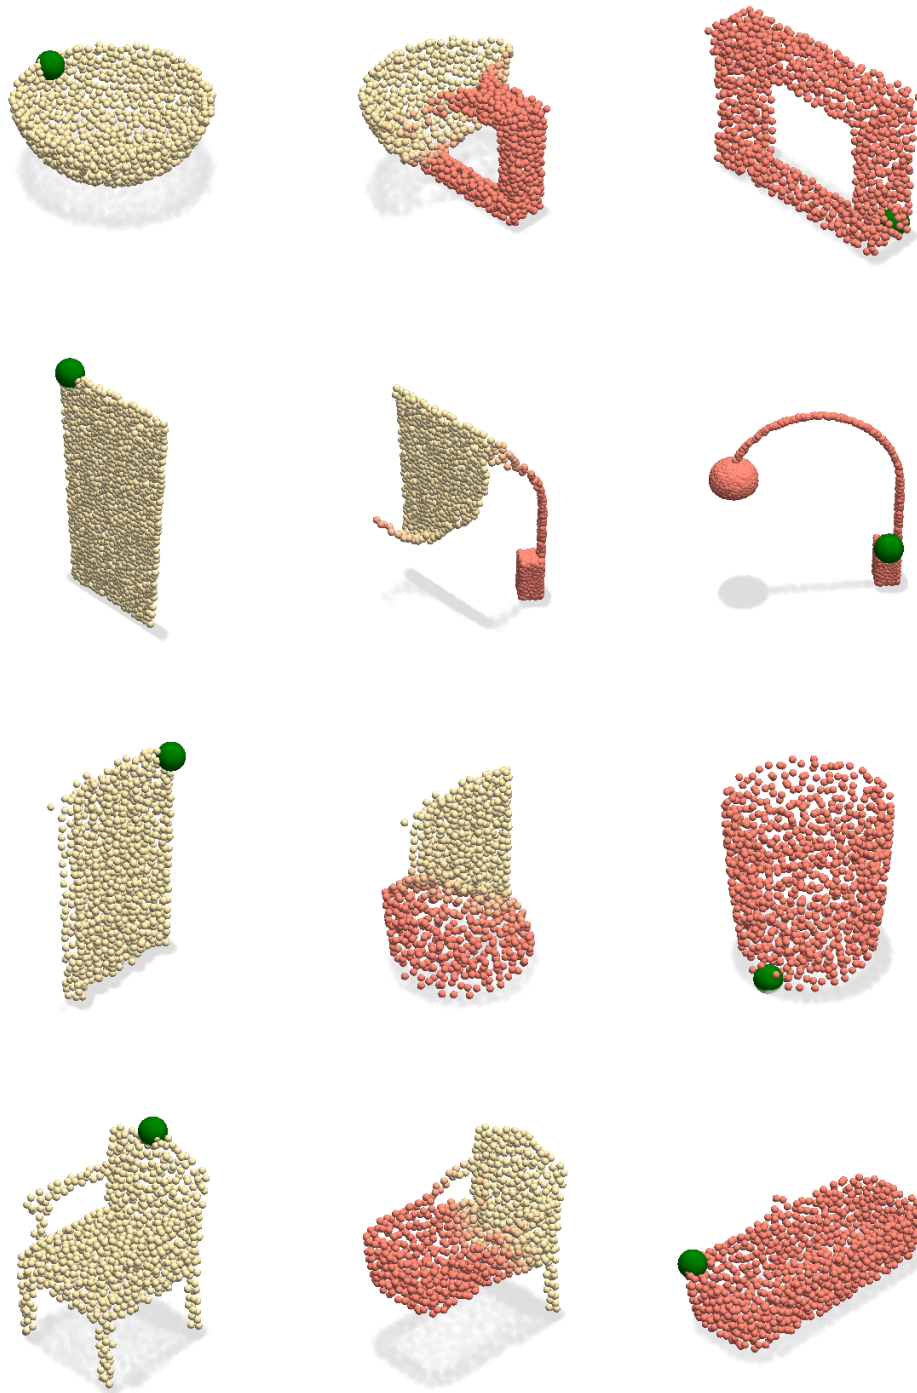

Figure 2: **Visualization of augmented samples by SageMix.** Given two samples (left and right), SageMix generates a sample (middle) based on **query points**.

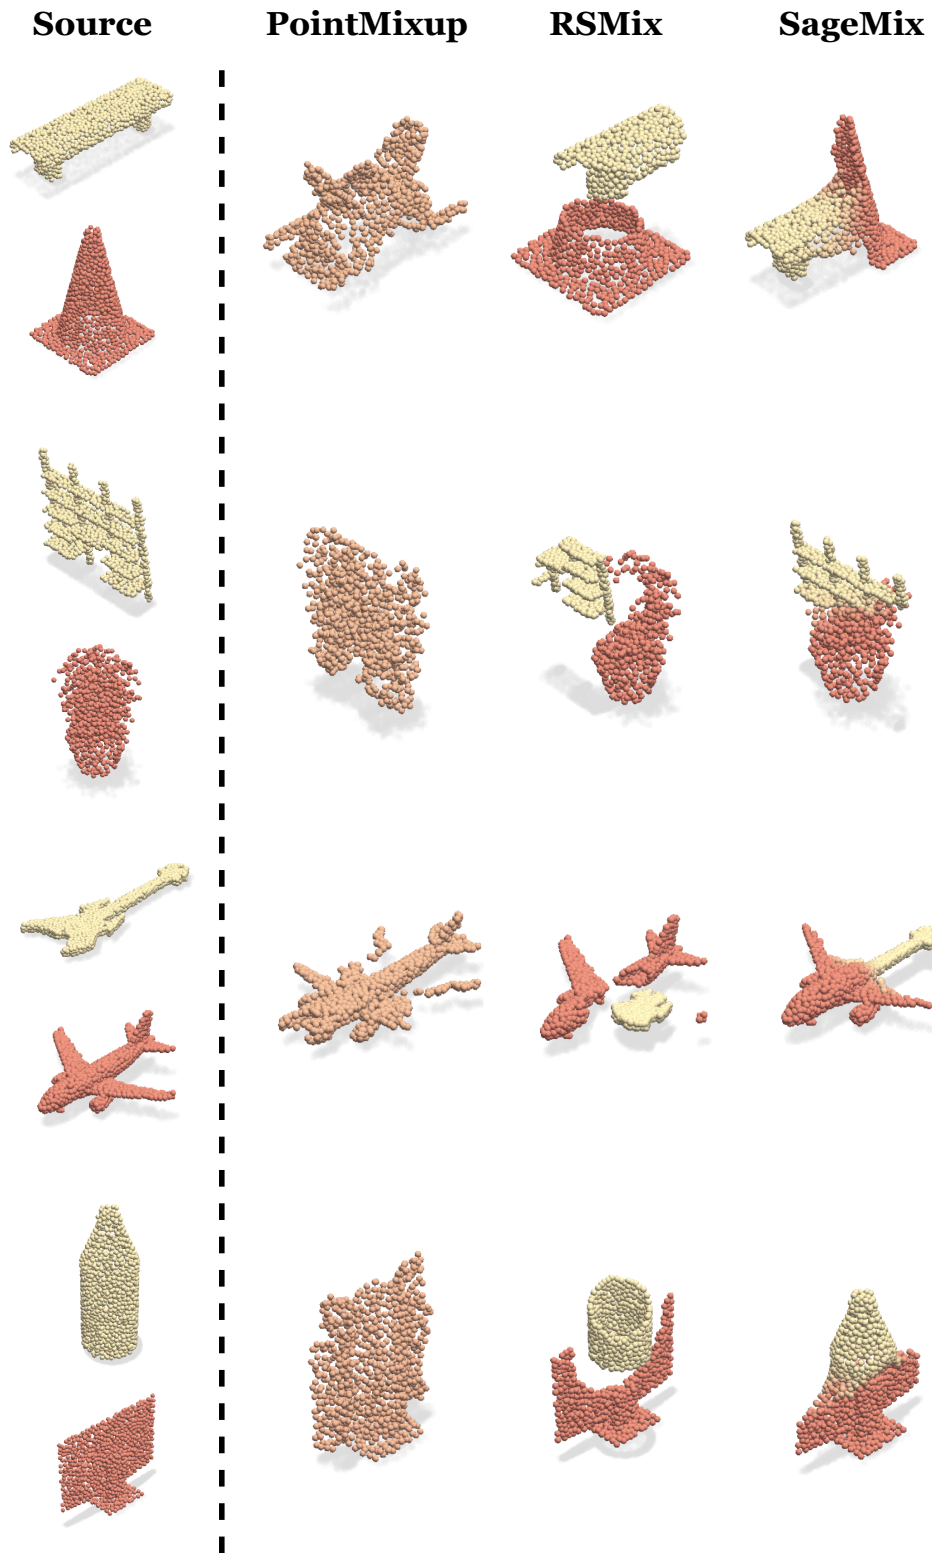

Figure 3: **Qualitative results with SageMix and baselines.** Given two source samples(left), PointMixup does not preserve the salient structure and RSMix loses the continuity. SageMix generates a continuous mixture preserving the local structure of original shapes(right).
